# Supplementary material for: Rational design of oxide/carbon composites to achieve superior rate-capability via enhanced lithium-ion transport across carbon to oxide
Source: Royal Society of Chemistry journal article supplement (doi:10.1039/c8ta00883c), 2018-01-01
Supplement: c8ta00883c1.pdf [file c8ta00883c1.pdf]

## **Electronic Supplementary Information**

# **Rational design of oxide/carbon composite to achieve superior rate-capability *via* enhanced lithium-ion transport across carbon to oxide**

Jun Hui Jeong<sup>a</sup>, Myeong-Seong Kim<sup>a</sup>, Yeon Jun Choi<sup>a</sup>, Geon-Woo Lee<sup>a</sup>, Byung Hoon Park<sup>a</sup>,  
Suk-Woo Lee<sup>a</sup>, Kwang Chul Roh<sup>b,\*</sup> and Kwang-Bum Kim<sup>a,\*</sup>

<sup>a</sup> Department of Materials Science and Engineering, Yonsei University, 50 Yonsei-ro,  
Seodaemun-gu, Seoul 03722, Republic of Korea

<sup>b</sup> Energy and Environmental Division, Korea Institute of Ceramic Engineering and  
Technology, 101 Soho-ro, Jinju-si, Gyeongsangnam-do, 52851, Republic of Korea.

\* Corresponding authors.

E-mail addresses: [rkc@kicet.re.kr](mailto:rkc@kicet.re.kr) (K. C. Roh), [kbkim@yonsei.ac.kr](mailto:kbkim@yonsei.ac.kr) (K. B. Kim)

**Table S1.** Brunauer–Emmett–Teller (BET) specific surface areas and pore volumes of LTO/rGO, LTO/L-NPG, LTO/M-NPG, and LTO/H-NPG composites

|                  | <b>BET surface area<br/>(m<sup>2</sup> g<sup>-1</sup>)</b> | <b>Pore Volume<br/>(cm<sup>3</sup> g<sup>-1</sup>)</b> |
|------------------|------------------------------------------------------------|--------------------------------------------------------|
| <b>LTO/rGO</b>   | <b>25.4</b>                                                | <b>0.208</b>                                           |
| <b>LTO/L-NPG</b> | <b>43.7</b>                                                | <b>0.311</b>                                           |
| <b>LTO/M-NPG</b> | <b>44.1</b>                                                | <b>0.327</b>                                           |
| <b>LTO/H-NPG</b> | <b>41.9</b>                                                | <b>0.364</b>                                           |

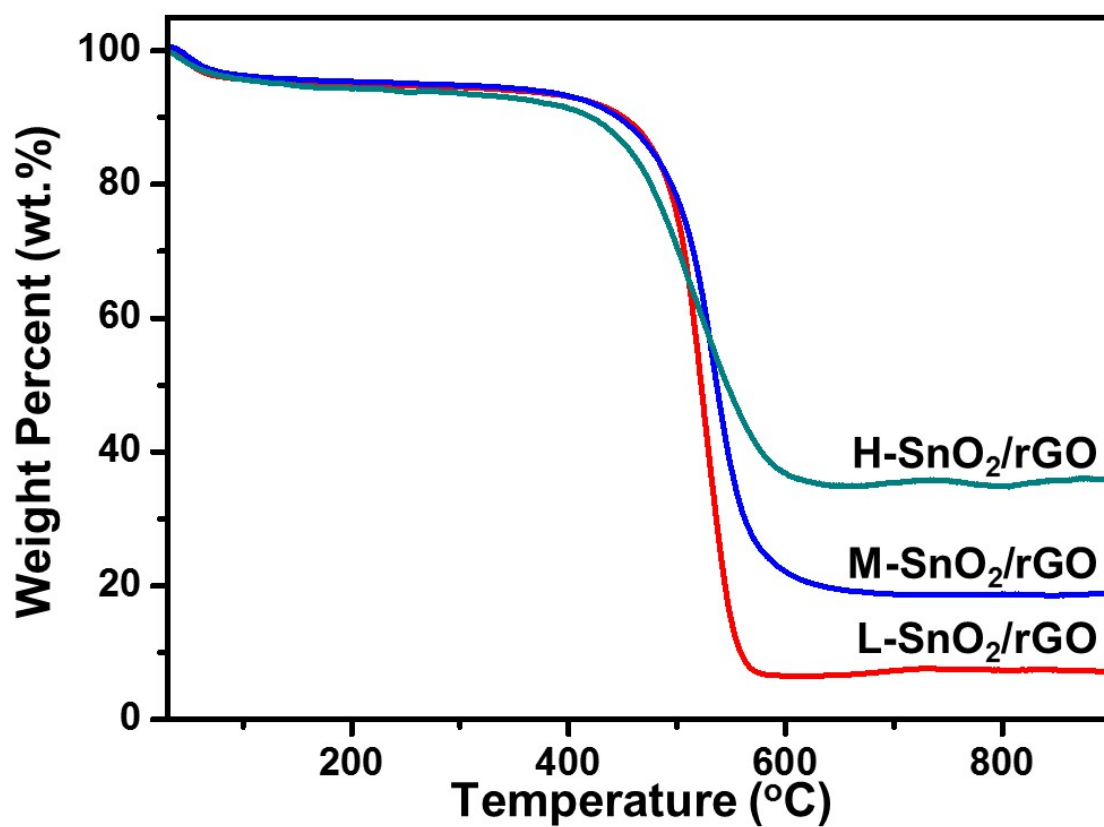

Fig. S1. TGA profiles of SnO<sub>2</sub>/rGO composites with different loading amounts of SnO<sub>2</sub>.

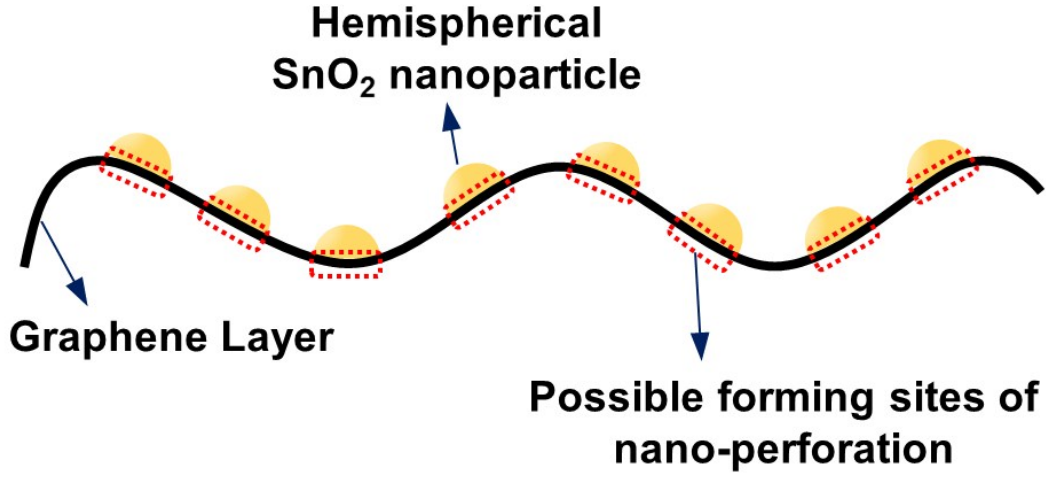

**Fig. S2.** Schematic diagram of SnO<sub>2</sub>/rGO composite illustrating hemispherical SnO<sub>2</sub> nanoparticles deposited on the basal plane of graphene.

As illustrated in Fig. S2, we assumed the hemispherical SnO<sub>2</sub> nanoparticles deposited on the basal plane of graphene in calculating the number of nano-perforations in the NPG. Since nano-perforations were created only at the contact points with the hemispherical SnO<sub>2</sub> nanoparticles, number of nano-perforations in the NPG was determined by the number of hemispherical SnO<sub>2</sub> nanoparticles in the composite. The number of SnO<sub>2</sub> nanoparticles ( $N$ ), which is equivalent to the number of nano-perforations, in the composites was calculated by dividing the weight of SnO<sub>2</sub> in SnO<sub>2</sub>/rGO composites by the weight of a single hemispherical SnO<sub>2</sub> nanoparticle.

$$N = (Wx/100) / \{(4\pi r^3 \rho / 3) / 2\} \quad (\text{Eq. S1})$$

where  $W$  is the weight of SnO<sub>2</sub>/rGO composite (g) used for TGA,  $x$  is the weight percent of SnO<sub>2</sub> nanoparticles in SnO<sub>2</sub>/rGO composite (wt%) from TGA,  $r$  is the radius of a SnO<sub>2</sub> nanoparticle (3 nm),  $\rho$  is the density of SnO<sub>2</sub> (6.95 g cm<sup>-3</sup>).

As the weight percent of SnO<sub>2</sub> nanoparticles in SnO<sub>2</sub>/rGO composite increases, the weight percent of rGO in SnO<sub>2</sub>/rGO composite decreases. Therefore, the area of rGO available for SnO<sub>2</sub> nanoparticle deposition decreases. Finally, number density of nano-perforations, which is the number of nano-perforations per unit area, in the NPG was calculated as follows: (1) the area of rGO ( $S$ , m<sup>2</sup>) available for SnO<sub>2</sub> nanoparticle deposition in SnO<sub>2</sub>/rGO composite was calculated by multiplying the weight of rGO in the composite and the specific surface area of rGO; and (2) the number density of nano-perforations in the NPG ( $\mu\text{m}^{-2}$ ) was calculated by dividing the number of nano-perforations in the NPG by the area of rGO in SnO<sub>2</sub>/rGO composite:

$$S = W\{1-(x/100)\}A \quad (\text{Eq. S2})$$

$$\text{Number Density} = N/S \quad (\text{Eq. S3})$$

where  $A$  is the specific surface area of rGO (300 m<sup>2</sup> g<sup>-1</sup>) measured in BET analysis.

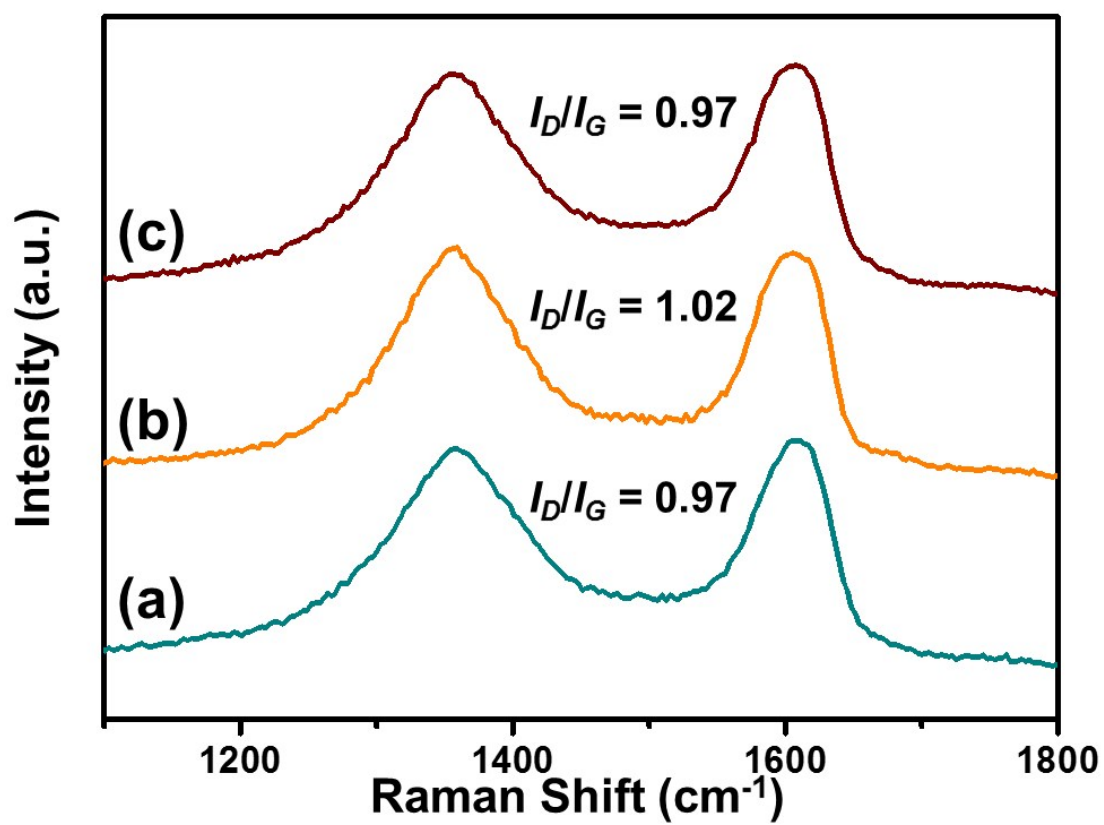

Fig. S3. Raman spectra of (a) NPG, (b) acid-treated NPG (a-NPG), and (c) heat-treated a-NPG.

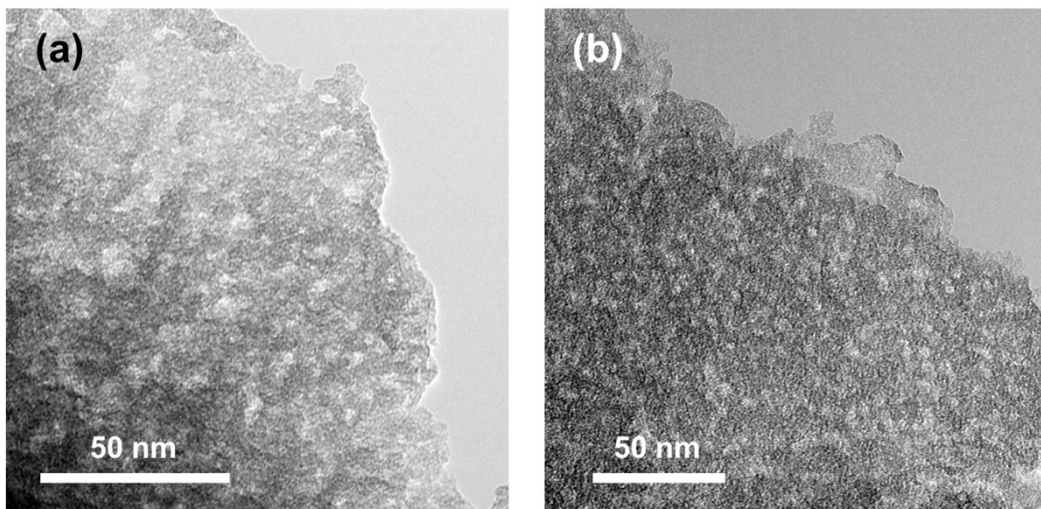

**Fig. S4.** TEM images of (a) a-NPG and (b) heat-treated a-NPG.

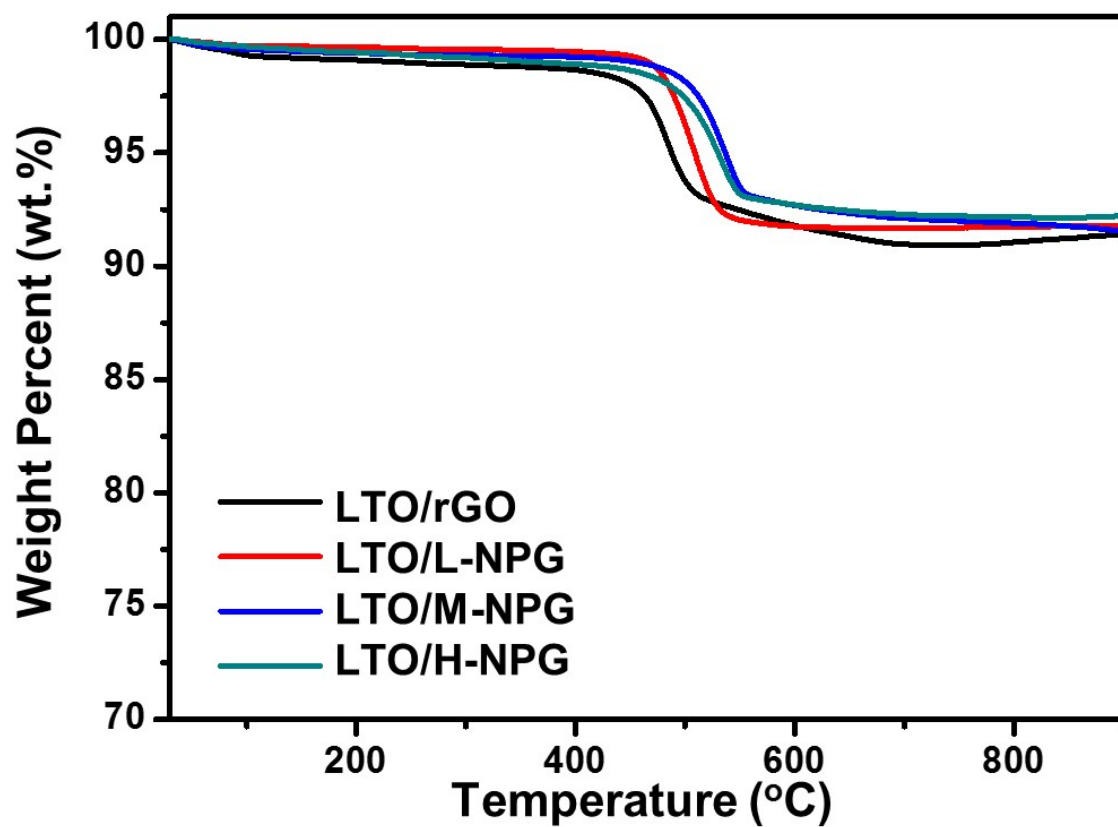

**Fig. S5.** TGA profiles of LTO/rGO, LTO/L-NPG, LTO/M-NPG, and LTO/H-NPG composites.



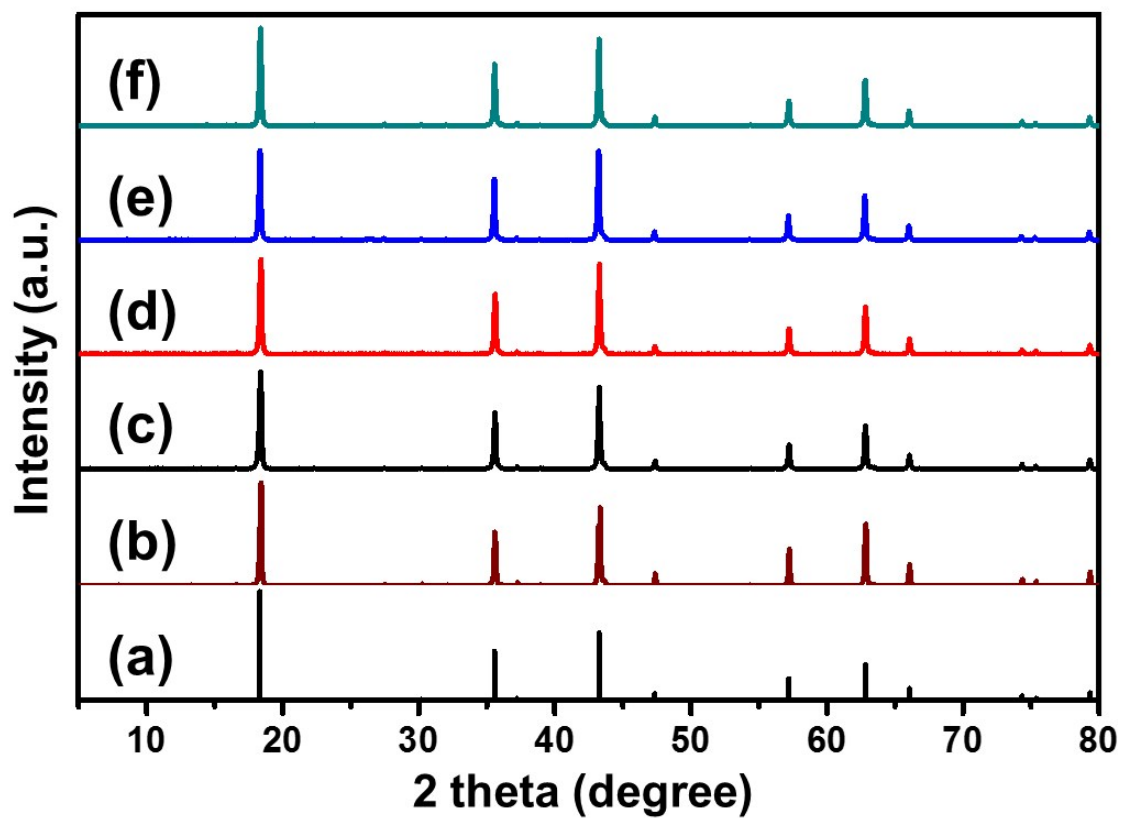

**Fig. S6.** XRD patterns of (a) JCPDS card No. 490207, (b) bare LTO, (c) LTO/rGO composite, (d) LTO/L-NPG composite, (e) LTO/M-NPG composite, and (f) LTO/H-NPG composite.

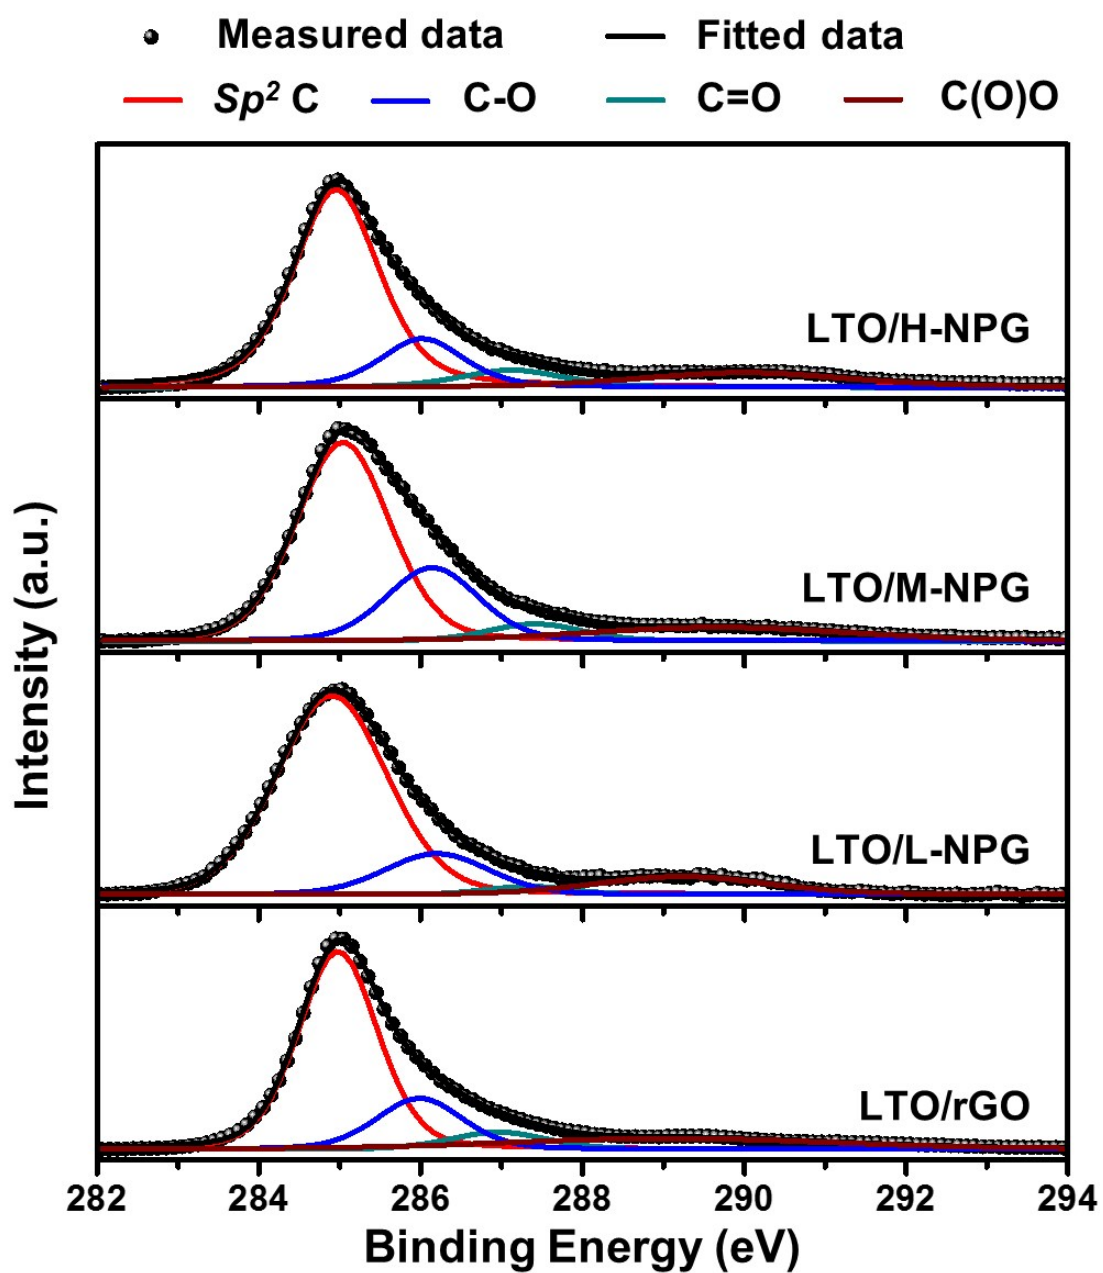

Fig. S7. XPS  $C1s$  spectra of LTO/rGO, LTO/L-NPG, LTO/M-NPG, and LTO/H-NPG composites.

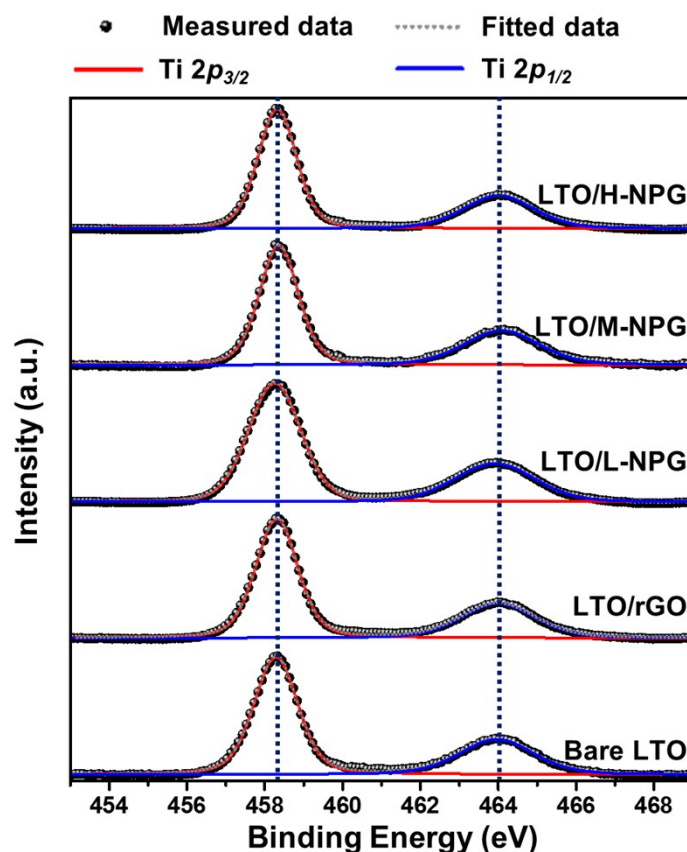

**Fig. S8.** XPS Ti 2 $p$  spectra of bare LTO and LTO/rGO, LTO/L-NPG, LTO/M-NPG, and LTO/H-NPG composites.

The Ti2 $p$  XPS spectra of bare LTO and LTO/rGO, LTO/L-NPG, LTO/M-NPG, and LTO/H-NPG composites were analyzed to investigate the oxidation state of Ti in the composites (Fig. S8<sup>†</sup>). All the LTO composites and bare LTO could be deconvoluted into two different peaks centered at 458.3 and 464.0 eV, corresponding to Ti2 $p_{2/3}$  and Ti2 $p_{1/2}$ , respectively, which was the characteristic peaks of Ti<sup>4+</sup>. In addition, the binding energy difference of 5.7 eV between the two peaks was observed for all the LTO composites and bare LTO, indicating that the oxidation state of Ti was Ti<sup>4+</sup>.

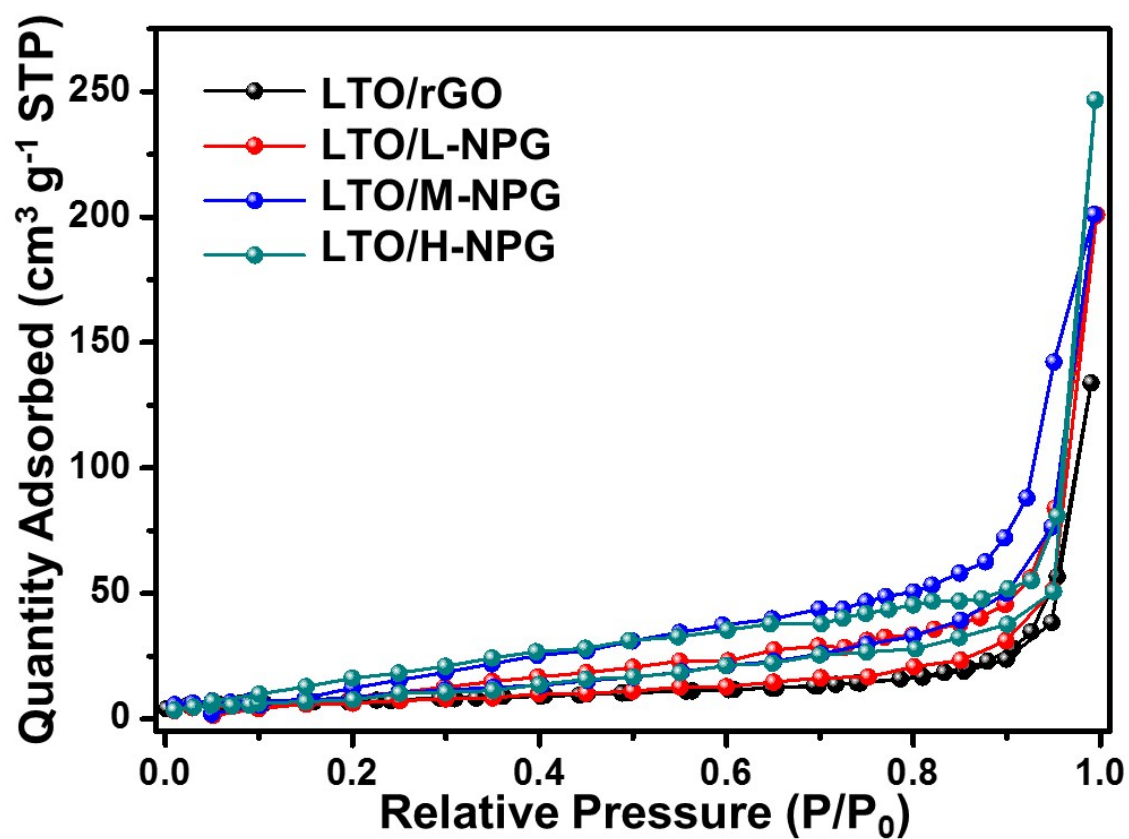

Fig. S9. N<sub>2</sub> gas adsorption/desorption isotherms of LTO/rGO, LTO/L-NPG, LTO/M-NPG, and LTO/H-NPG composites.

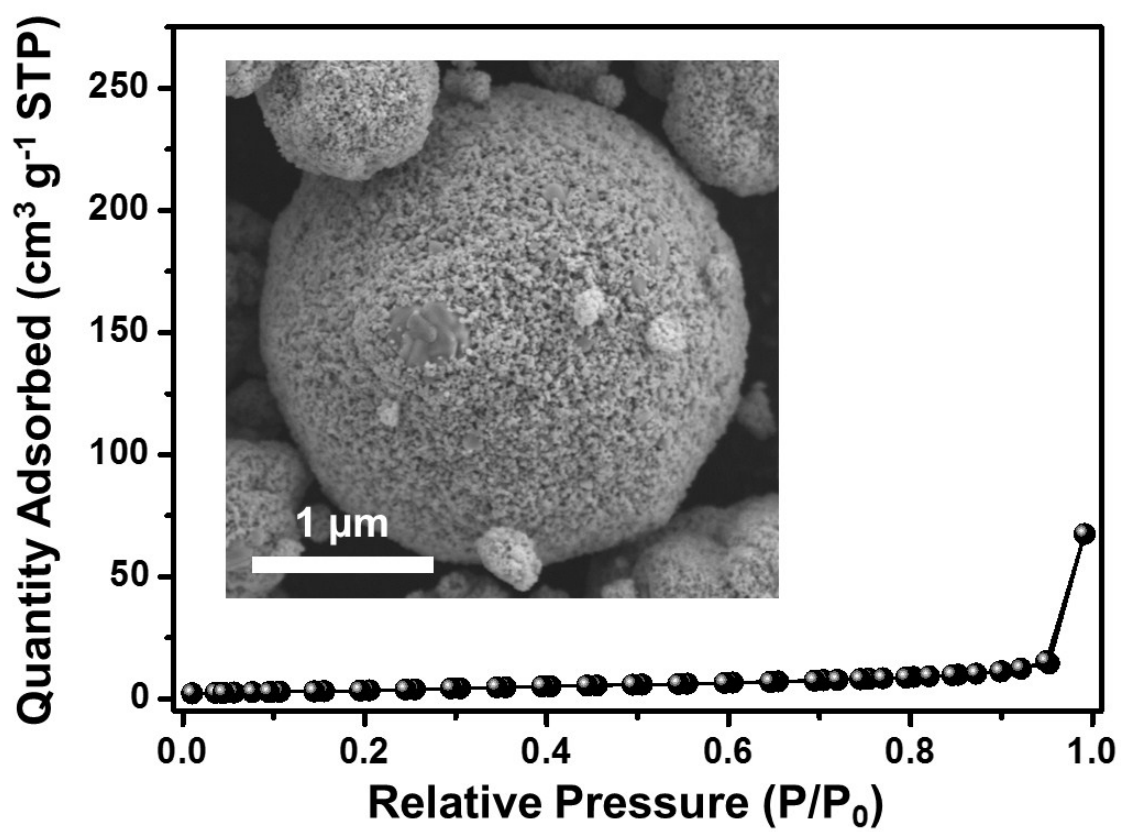

**Fig. S10.** SEM image (inset) and N<sub>2</sub> adsorption/desorption isotherms of pure LTO microspheres without NPG.

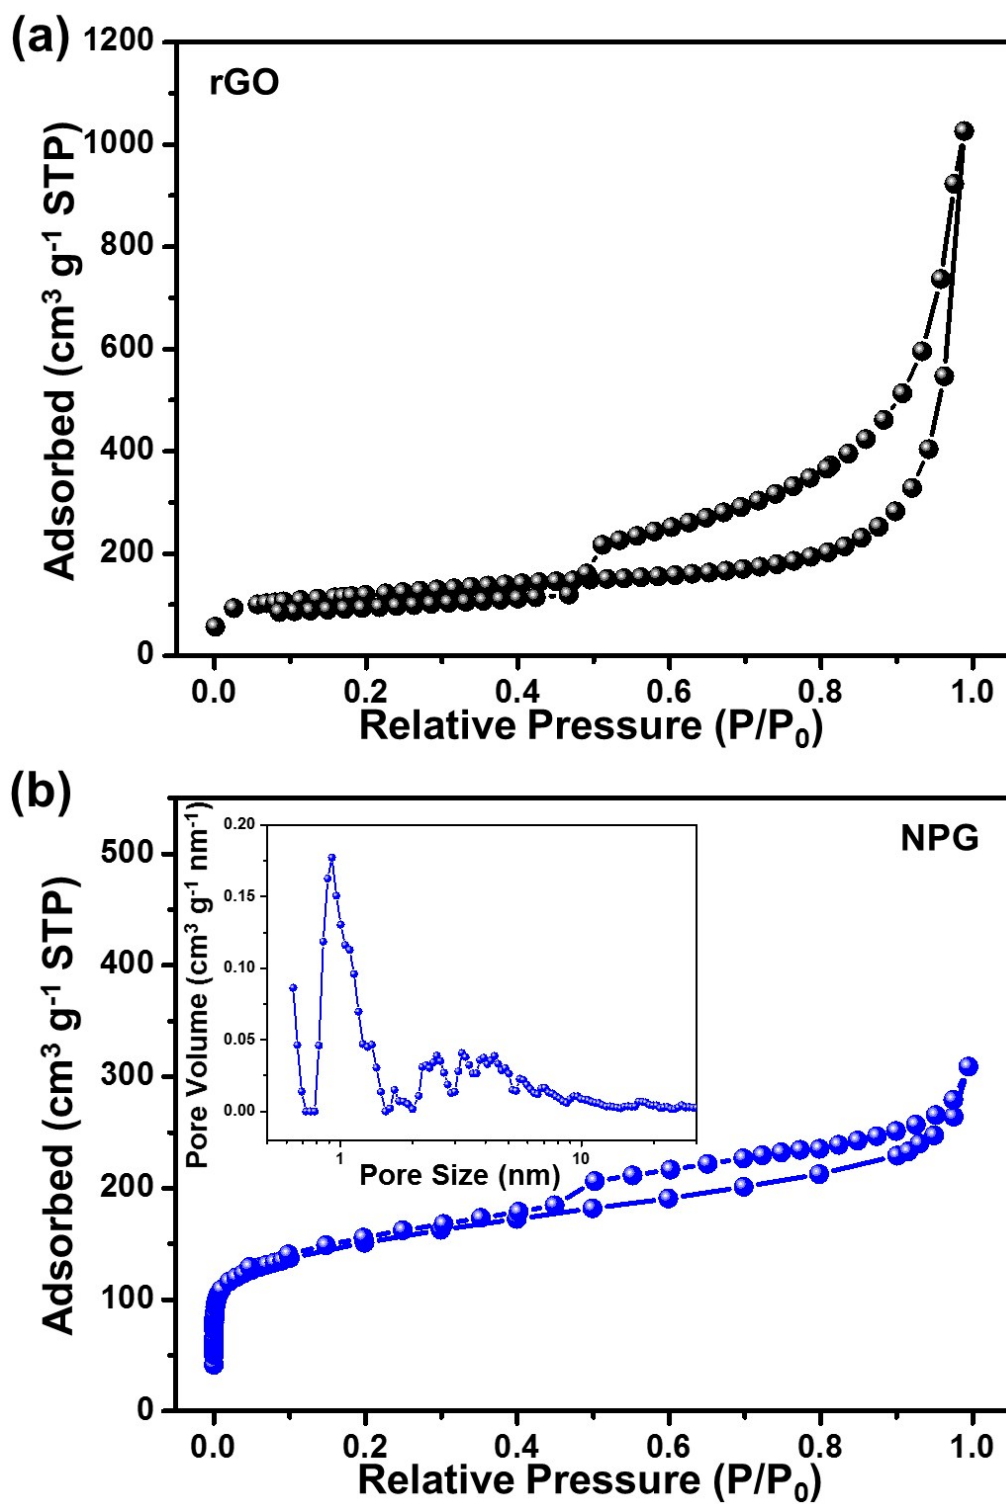

Fig. S11.  $\text{N}_2$  adsorption/desorption isotherms of (a) rGO and (b) NPG.

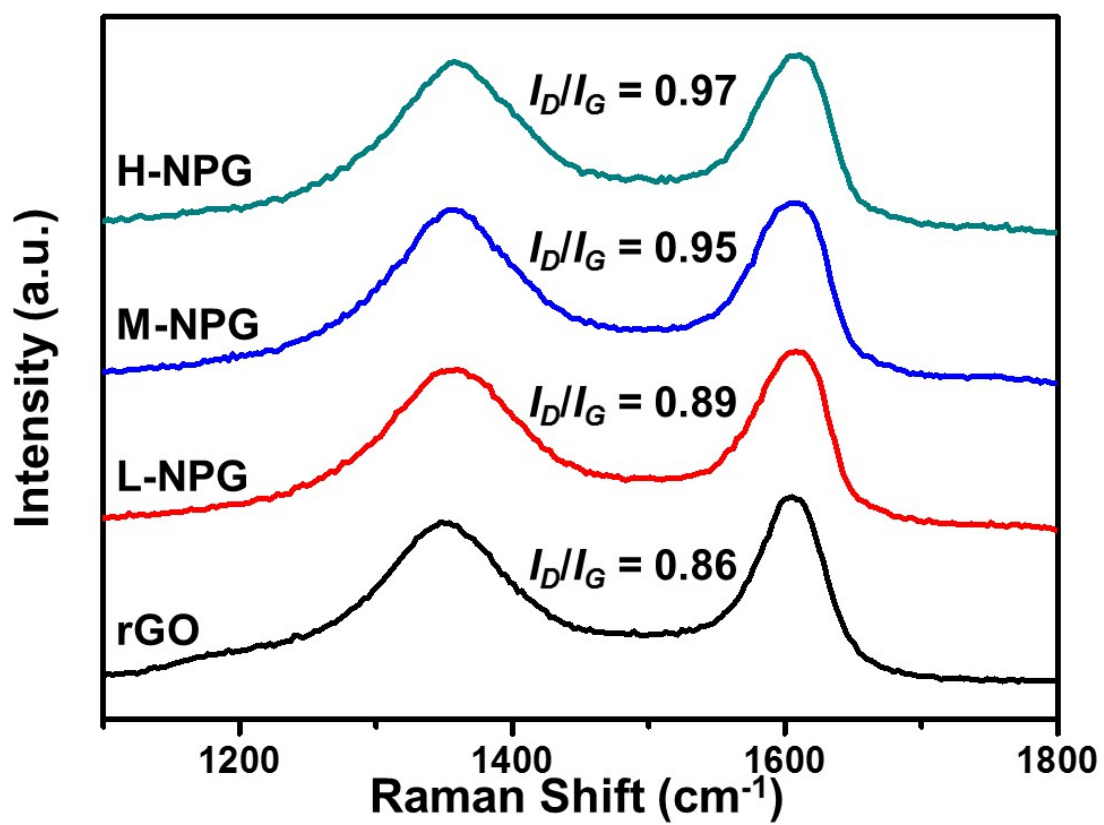

Fig. S12. Raman spectra of rGO, L-NPG, M-NPG, and H-NPG.

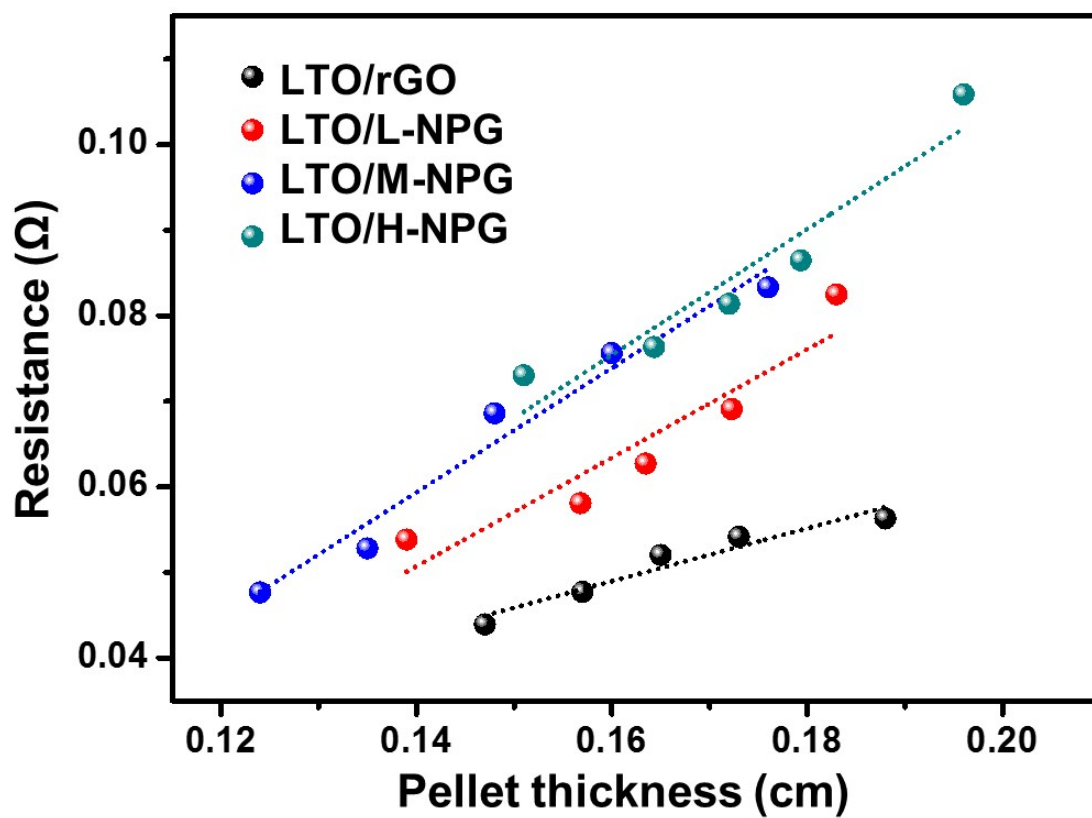

**Fig. S13.** Linear plot of the resistance as a function of the pellet thickness for calculating the electronic conductivity of LTO/rGO, LTO/L-NPG, LTO/M-NPG, and LTO/H-NPG composites.



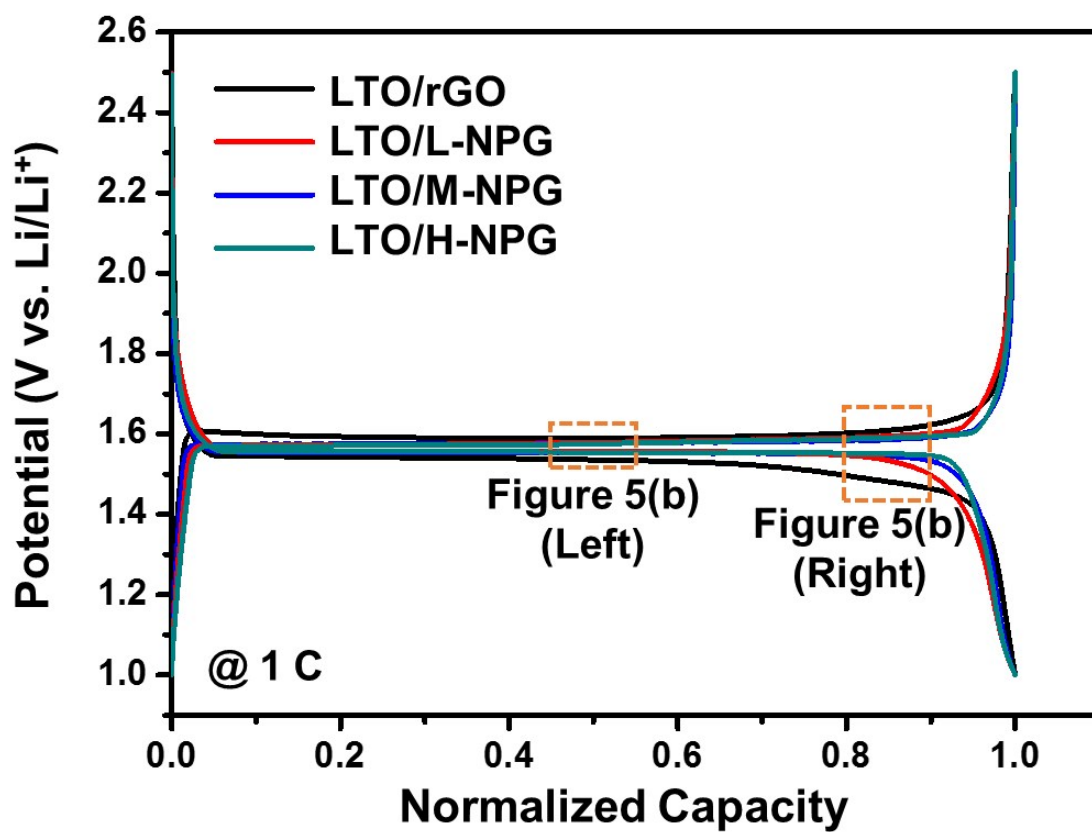

**Fig. S14.** GCD profiles of LTO/rGO, LTO/L-NPG, LTO/M-NPG, and LTO/H-NPG composites normalized with respect to the specific discharge capacities at 1 C.

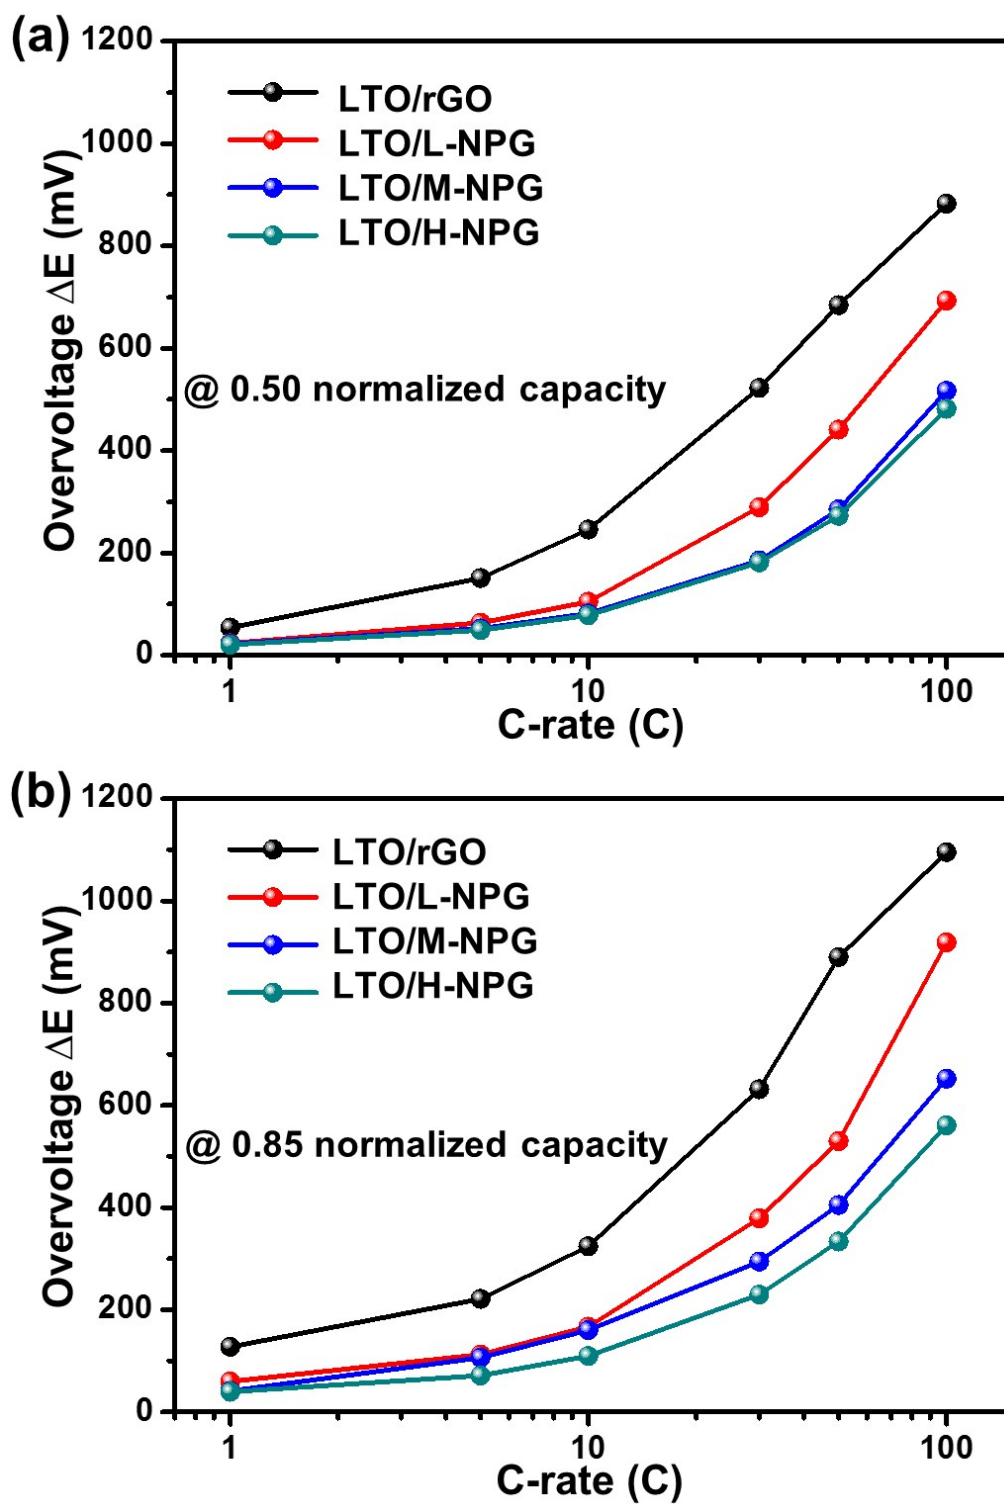

**Fig. S15.** Overvoltage plots of LTO/rGO, LTO/L-NPG, LTO/M-NPG, and LTO/H-NPG composites at normalized capacities of (a) 0.5 and (b) 0.85.

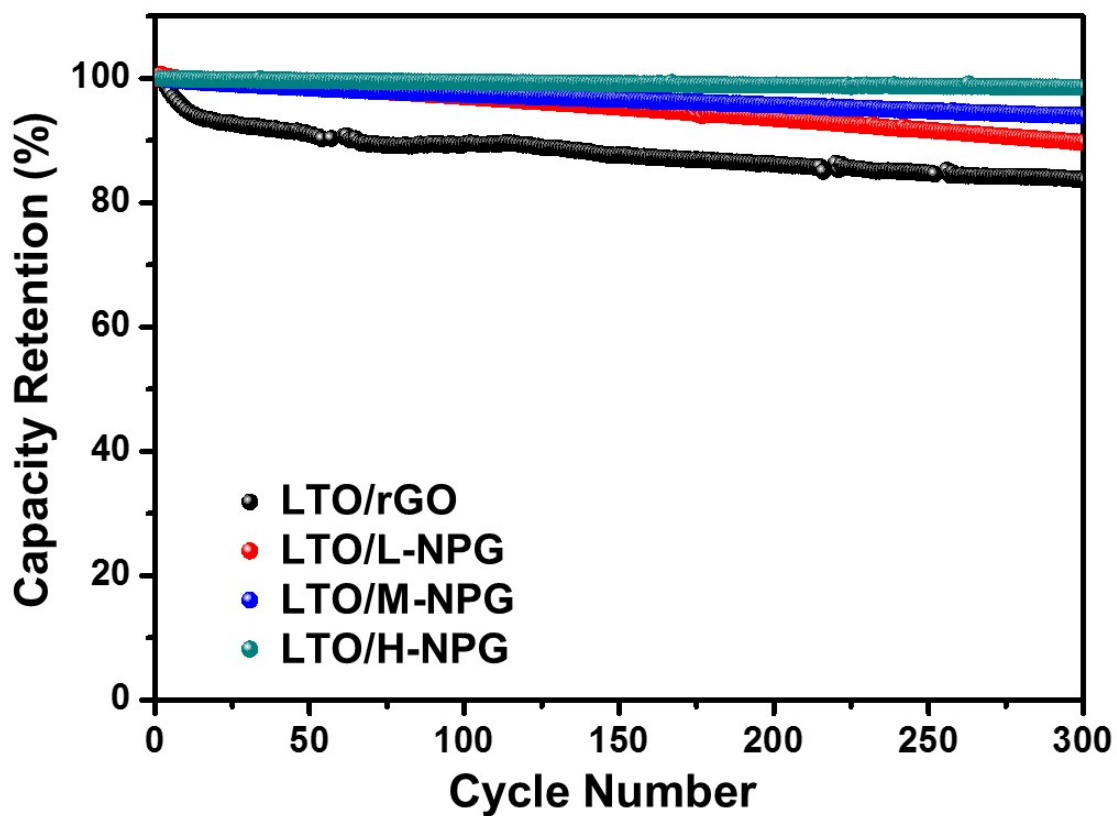

**Fig. S16.** Cycle performance of LTO/rGO, LTO/L-NPG, LTO/M-NPG, and LTO/H-NPG composites.

Fig. S16<sup>†</sup> compares the cyclabilities of LTO/rGO, LTO/L-NPG, LTO/M-NPG, and LTO/H-NPG composites over 300 cycles at 10 C. The LTO/NPG composites showed better cycling stabilities than LTO/rGO composite. After 300 cycles, LTO/rGO, LTO/L-NPG, LTO/M-NPG, and LTO/H-NPG composites could retain 83.7, 89.7, 95.4, and 98.6% of their initial discharge capacities, respectively.

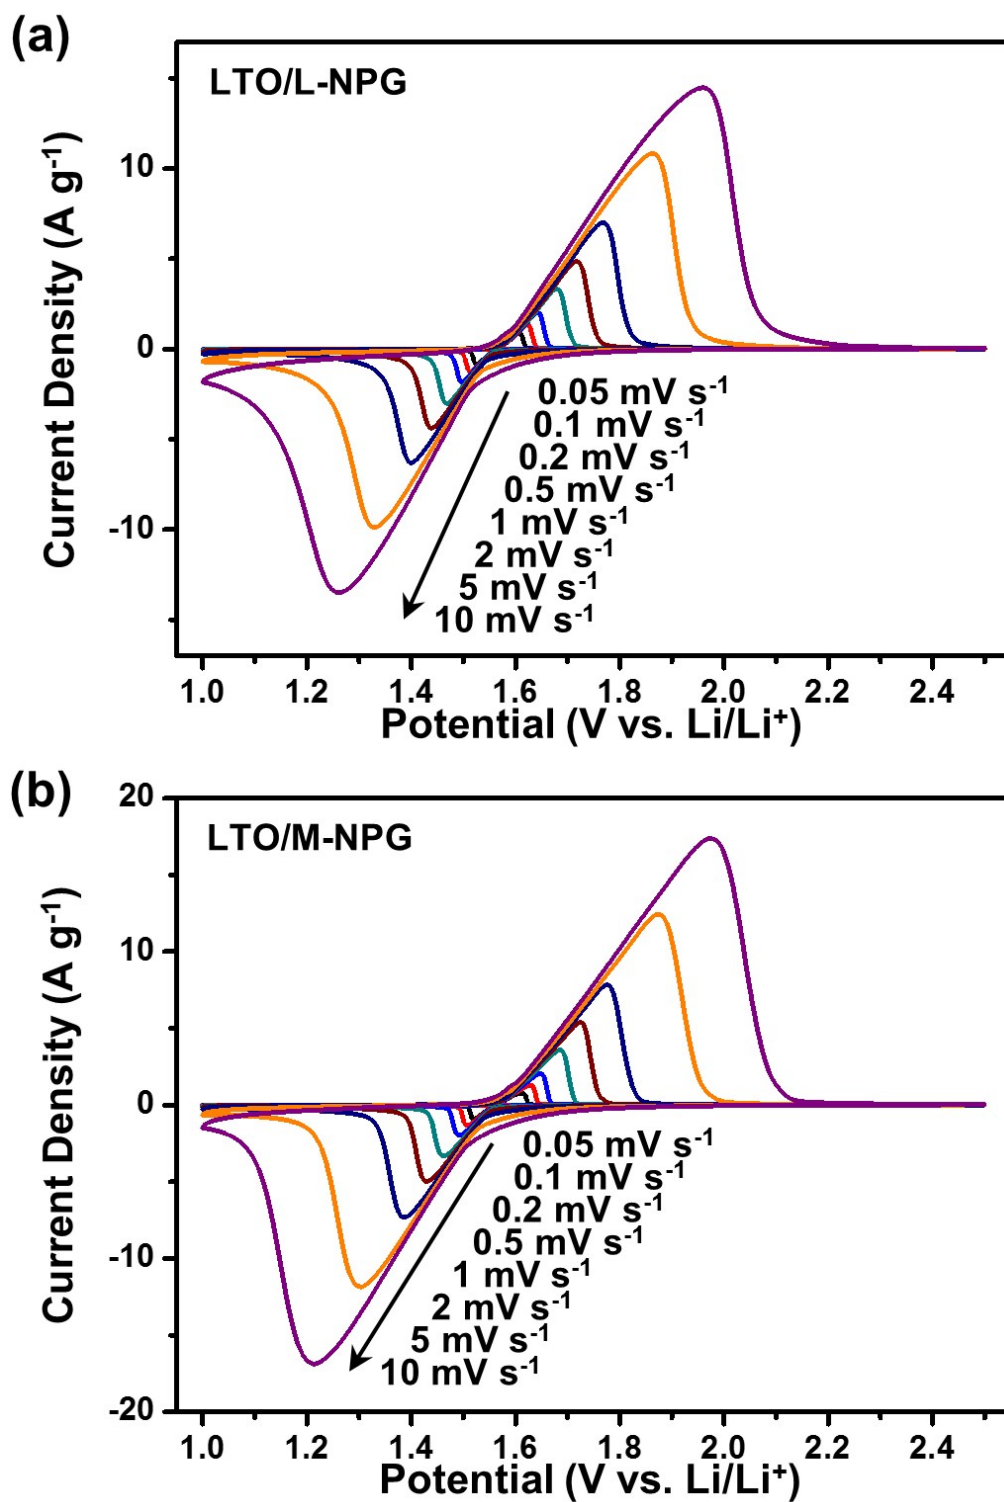

**Fig. S17.** CV profiles of (a) LTO/L-NPG and (b) LTO/M-NPG composites at increasing scan rates from 0.05 to 10  $\text{mV s}^{-1}$ .

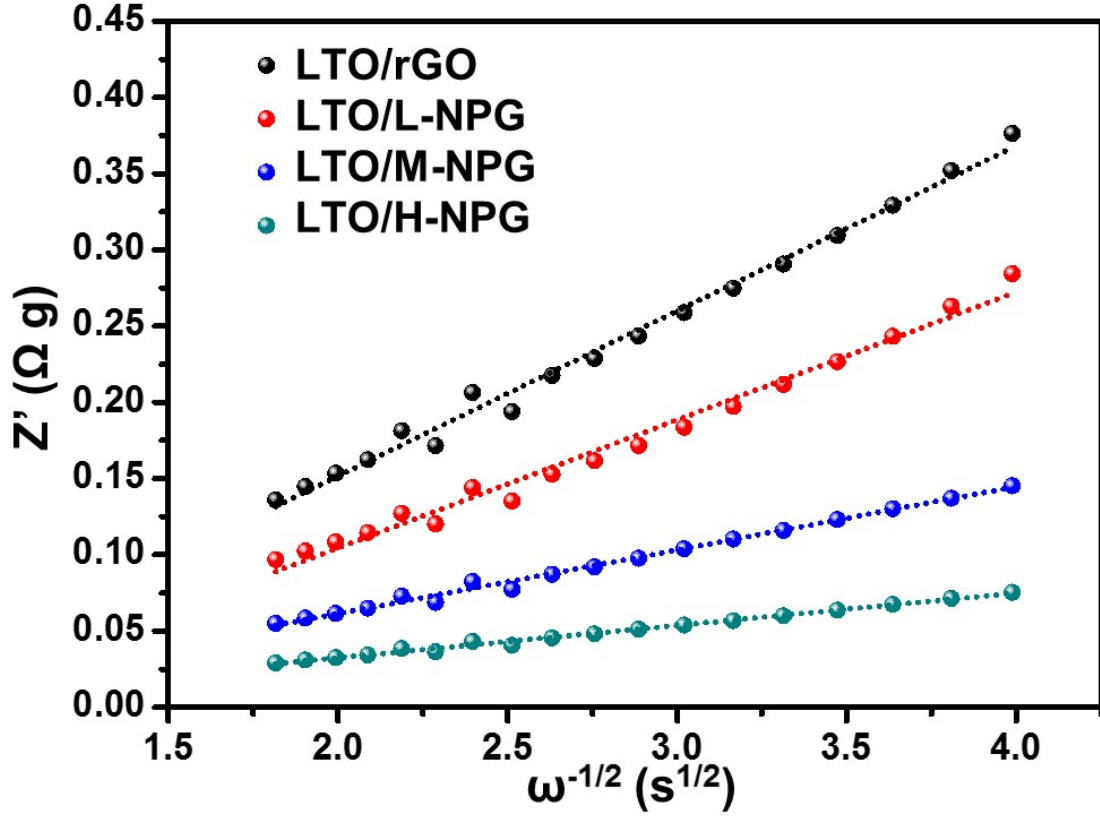

**Fig. S18.** Plot of real part of impedance vs.  $\omega^{-1/2}$  (angular frequency<sup>-1/2</sup>) for LTO/rGO, LTO/L-NPG, LTO/M-NPG and LTO/H-NPG composites.

To further analyze the EIS data of the LTO composites, the real part of the impedance in the low-frequency region ( $Z'$ ) was plotted against the reciprocal square root of the angular frequency ( $\omega^{-1/2}$ ) at low frequencies in Fig. S18<sup>†</sup>. The linearity in Fig. S18<sup>†</sup> is associated with solid state diffusion of lithium ions in the bulk LTO. Equations S4 and S5 show the relationship between  $D_{app}$  and the Warburg factor ( $\sigma$ ).

$$Z' = R_s + R_l + R_{ct} + \sigma\omega^{-1/2} \quad (\text{Eq. S4})$$

$$D_{app} = (R^2T^2)/(2A^2n^4F^4C_{Li}^2\sigma^2) \quad (\text{Eq. S5})$$

where  $D_{app}$  is the apparent diffusion coefficient,  $R$  is the gas constant,  $T$  is the absolute temperature,  $A$  is the specific surface area of the electrochemically active sites ( $\text{m}^2\cdot\text{g}^{-1}$ ),  $n$  is the number of electrons per molecule during the reaction,  $F$  is the Faraday constant,  $C_{Li}$  is the concentration of the reactant, and  $\sigma$  is the Warburg factor calculated from the slope of the linear part of the EIS profiles between the real axis  $Z'$  and  $\omega^{-1/2}$  using Equation S4.

In this EIS analysis, we again set  $D_{app}$  a constant ( $10^{-12} \text{ cm}^2\cdot\text{s}^{-1}$ ) for LTO in the LTO composites according to the assumptions used for the CV data analysis using Randles–Sevcik equation Fig. 6(c). Finally, Equations S4 and S5 were used to calculate  $A$  for LTO/H-NPG, LTO/M-NPG, LTO/L-NPG, and LTO/rGO composites.  $A$  was calculated to be 4.327, 2.202, 1.092, and 0.847  $\text{m}^2\cdot\text{g}^{-1}$  for LTO/H-NPG, LTO/M-NPG, LTO/L-NPG and LTO/rGO composites, respectively.

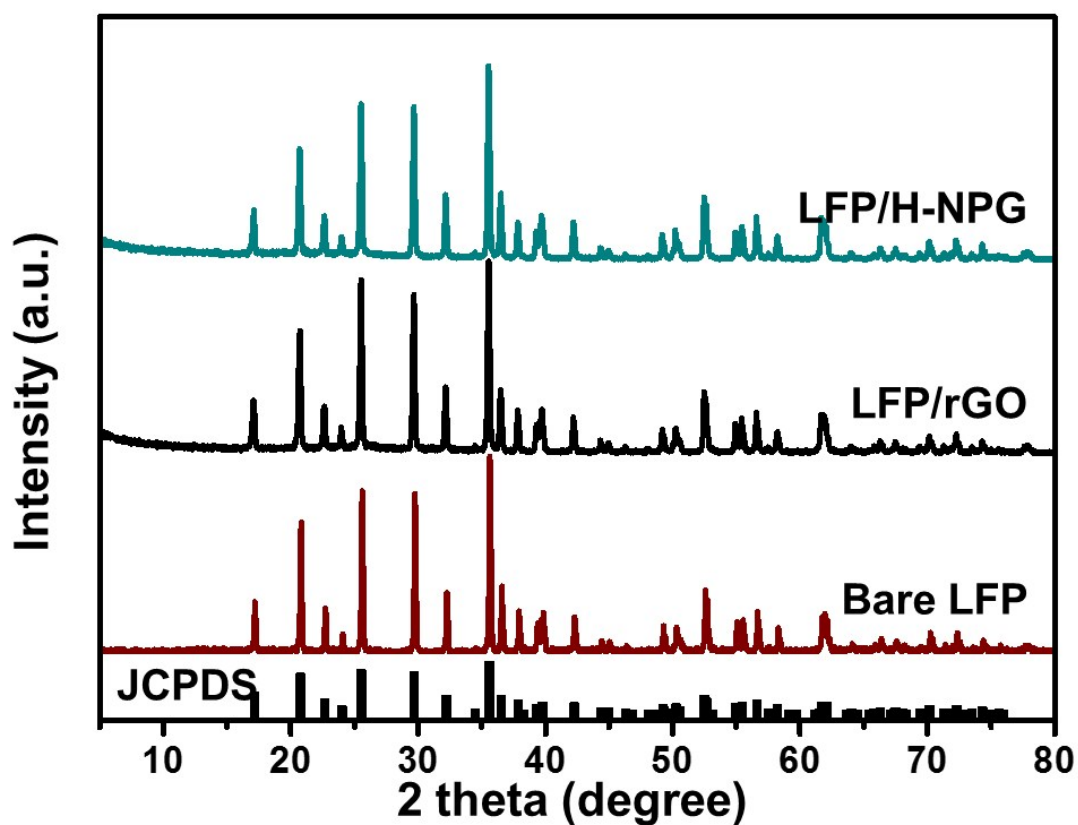

**Fig. S19.** XRD patterns of bare LFP, LFP/rGO composite, and LFP/H-NPG composite.

As shown in Fig. S19<sup>†</sup>, the XRD patterns of the LFP composites exhibited all the standard peaks observed for olivine LFP with the  $P_{nma}$  space group (JCPDS card No. 83-2092). No impurity peaks were observed in the XRD patterns of the LFP composites, indicating that the spray-drying process and heat treatment did not cause any structural changes of the olivine LFP.

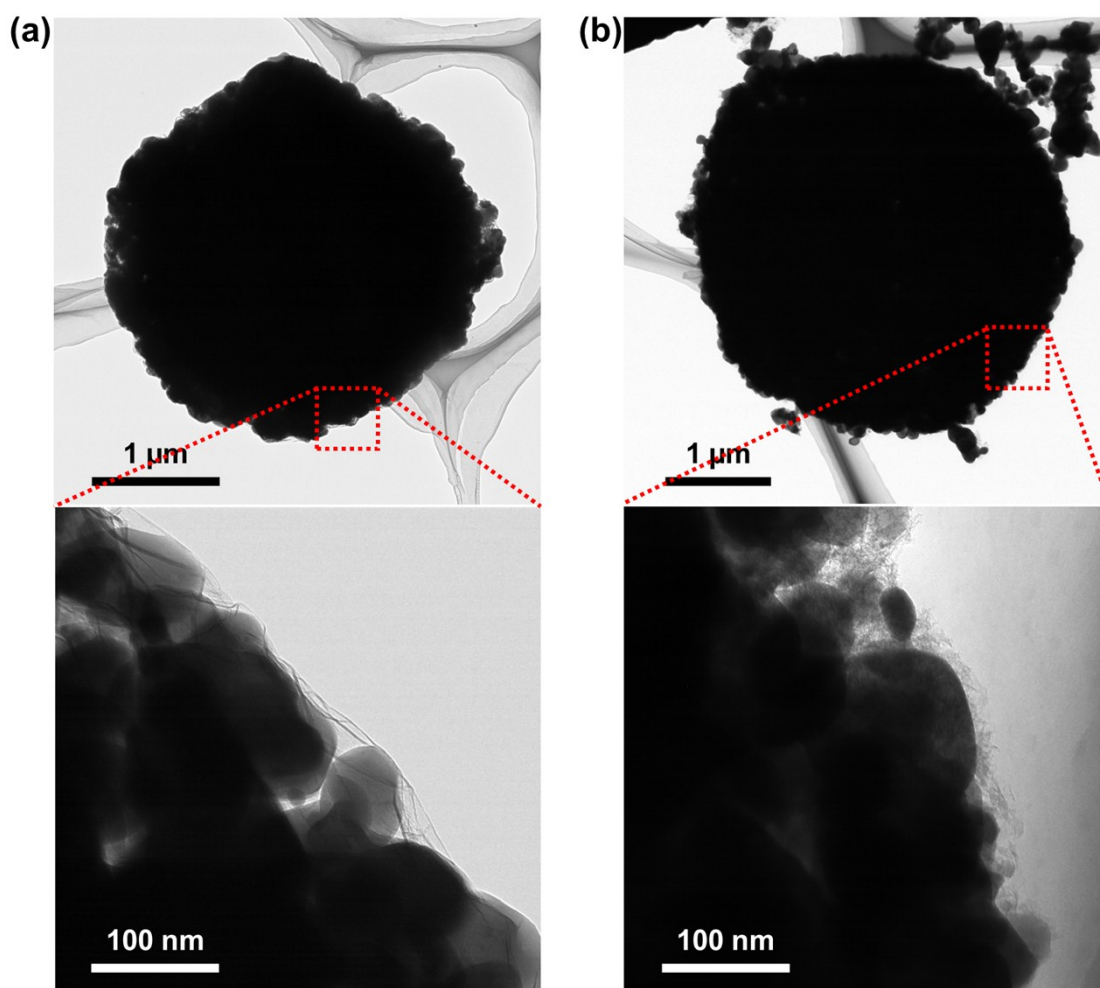

**Fig. S20.** TEM images of (a) LFP/rGO and (b) LFP/H-NPG composites.

Fig. S20<sup>†</sup> shows TEM images of LFP/rGO and LFP/H-NPG composites. A typical low-magnification TEM image reveals that the primary LFP nanoparticles were densely packed, consisting of secondary spherical micro-particles with diameters of  $\sim 3 \mu\text{m}$ . In addition, the appearance of the edge of an individual composite particle at higher magnification reveals that the LFP particles were wrapped by a thin layer of NPG (or rGO).



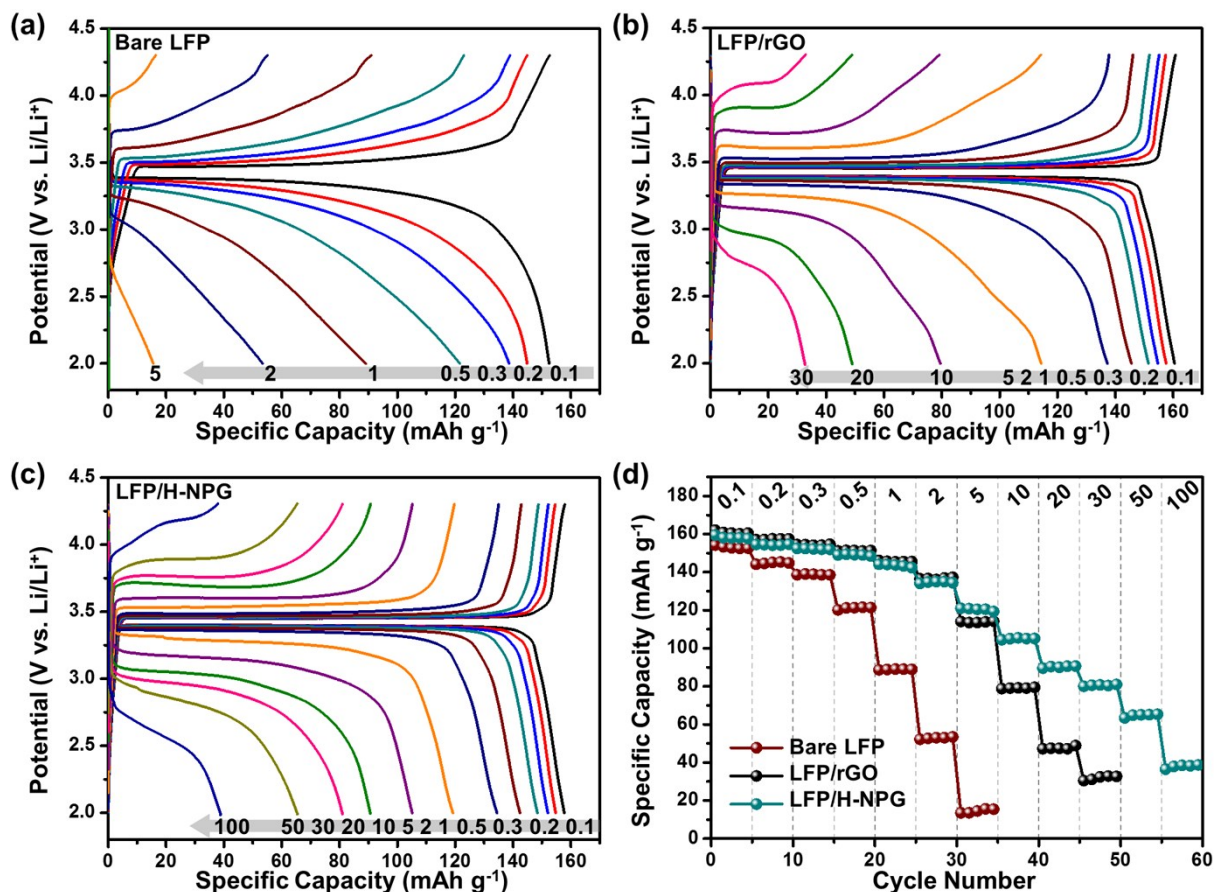

**Fig. S21.** Electrochemical properties of bare LFP, LFP/rGO composite and LFP/H-NPG composite in 1 M LiPF<sub>6</sub> 1:1 EC/DMC electrolyte in the 2.0–4.3 V potential window. The GCD profiles of (a) bare LFP, (b) LFP/rGO composite and (c) LFP/H-NPG composite at increasing C-rates from 0.1 to 100 C. (d) Plots of the rate capability of bare LFP, LFP/rGO composite, and LFP/H-NPG composite.
